# Supplementary material for: Long-term effects of preeclampsia on maternal cardiovascular health and postpartum utilization of primary care: an observational claims data study
Source: PubMed Central journal article supplement (PMC9836976; doi:10.1007/s00404-022-06561-w), 2022-04-28
Supplement: 404_2022_6561_MOESM1_ESM.pdf [file 404_2022_6561_MOESM1_ESM.pdf]

## Data Supplement

**Table S1.** *Visits to general practitioner stratified for the occurrence of PE.*

| Time after birth (years) | No PE (%) | PE Pregnancies (%) | Difference (%) |
|--------------------------|-----------|--------------------|----------------|
| 0.00                     | 41.41     | 55.37              | 13.96          |
| 0.25                     | 43.04     | 53.42              | 10.39          |
| 0.50                     | 44.52     | 52.58              | 8.06           |
| 0.75                     | 45.64     | 53.13              | 7.50           |
| 1.00                     | 46.45     | 54.45              | 8.01           |
| 1.25                     | 47.89     | 55.27              | 7.38           |
| 1.50                     | 48.71     | 56.03              | 7.31           |
| 1.75                     | 49.37     | 55.63              | 6.26           |
| 2.00                     | 49.71     | 56.49              | 6.78           |
| 2.25                     | 50.54     | 57.26              | 6.72           |
| 2.50                     | 51.07     | 57.69              | 6.61           |
| 2.75                     | 51.54     | 57.61              | 6.06           |
| 3.00                     | 52.43     | 59.41              | 6.97           |
| 3.25                     | 53.44     | 60.66              | 7.22           |
| 3.50                     | 54.24     | 60.77              | 6.53           |
| 3.75                     | 54.06     | 60.84              | 6.78           |
| 4.00                     | 54.19     | 61.70              | 7.52           |
| 4.25                     | 53.97     | 60.81              | 6.84           |
| 4.50                     | 54.32     | 60.79              | 6.47           |
| 4.75                     | 54.31     | 60.72              | 6.41           |
| 5.00                     | 54.08     | 60.90              | 6.82           |
| 5.25                     | 54.09     | 61.37              | 7.27           |
| 5.50                     | 54.32     | 61.19              | 6.87           |
| 5.75                     | 54.62     | 61.16              | 6.54           |
| 6.00                     | 54.28     | 60.54              | 6.26           |
| 6.25                     | 54.24     | 60.02              | 5.78           |
| 6.50                     | 54.50     | 61.76              | 7.26           |
| 6.75                     | 54.81     | 62.67              | 7.86           |

|      |       |       |      |
|------|-------|-------|------|
| 7.00 | 54.63 | 61.63 | 7.01 |
| 7.25 | 54.82 | 61.73 | 6.91 |
| 7.50 | 55.61 | 62.78 | 7.16 |
| 7.75 | 56.01 | 62.64 | 6.63 |
| 8.00 | 56.28 | 64.49 | 8.21 |
| 8.25 | 55.88 | 62.94 | 7.06 |
| 8.50 | 55.56 | 63.82 | 8.26 |
| 8.75 | 57.14 | 64.65 | 7.52 |
| 9.00 | 56.99 | 65.33 | 8.34 |
| 9.25 | 55.77 | 64.09 | 8.33 |

*Notes.* PE = preeclampsia; % = percentage of quarterly visits in relation to observed patients

**Table S2.** *Visits to cardiologist stratified for the occurrence of PE.*

| Time after birth (years) | No PE (%) | PE Pregnancies (%) | Difference (%) |
|--------------------------|-----------|--------------------|----------------|
| 0.00                     | 0.33      | 1.07               | 0.74           |
| 0.25                     | 0.26      | 1.00               | 0.73           |
| 0.50                     | 0.32      | 0.85               | 0.54           |
| 0.75                     | 0.35      | 0.77               | 0.42           |
| 1.00                     | 0.39      | 0.82               | 0.43           |
| 1.25                     | 0.43      | 0.81               | 0.37           |
| 1.50                     | 0.44      | 0.79               | 0.35           |
| 1.75                     | 0.49      | 0.85               | 0.36           |
| 2.00                     | 0.51      | 0.91               | 0.40           |
| 2.25                     | 0.53      | 0.93               | 0.40           |
| 2.50                     | 0.56      | 0.95               | 0.40           |
| 2.75                     | 0.60      | 1.08               | 0.48           |
| 3.00                     | 0.57      | 0.93               | 0.36           |
| 3.25                     | 0.60      | 1.07               | 0.47           |
| 3.50                     | 0.61      | 1.13               | 0.52           |

|      |      |      |      |
|------|------|------|------|
| 3.75 | 0.64 | 1.13 | 0.49 |
| 4.00 | 0.68 | 1.21 | 0.53 |
| 4.25 | 0.68 | 1.08 | 0.40 |
| 4.50 | 0.66 | 1.16 | 0.50 |
| 4.75 | 0.76 | 1.26 | 0.50 |
| 5.00 | 0.73 | 1.00 | 0.27 |
| 5.25 | 0.70 | 1.12 | 0.42 |
| 5.50 | 0.72 | 1.23 | 0.51 |
| 5.75 | 0.76 | 1.32 | 0.56 |
| 6.00 | 0.75 | 1.43 | 0.68 |
| 6.25 | 0.73 | 1.15 | 0.41 |
| 6.50 | 0.79 | 0.99 | 0.21 |
| 6.75 | 0.86 | 1.27 | 0.42 |
| 7.00 | 0.72 | 0.98 | 0.26 |
| 7.25 | 0.83 | 1.28 | 0.44 |
| 7.50 | 0.99 | 1.33 | 0.34 |
| 7.75 | 0.88 | 1.28 | 0.40 |
| 8.00 | 0.83 | 1.26 | 0.43 |
| 8.25 | 0.85 | 0.92 | 0.07 |
| 8.50 | 0.81 | 1.35 | 0.54 |
| 8.75 | 1.11 | 1.57 | 0.46 |
| 9.00 | 1.02 | 1.67 | 0.64 |
| 9.25 | 1.14 | 2.35 | 1.21 |

*Notes.* PE = preeclampsia; % = percentage of quarterly visits in relation to observed patients

**Table S3.** Prescription of hypertensive medication stratified for the occurrence of PE.

| Time after birth (years) | No PE (%) | PE pregnancies (%) | Difference (%) |
|--------------------------|-----------|--------------------|----------------|
| 0.00                     | 0.58      | 10.62              | 10.04          |
| 0.25                     | 0.40      | 7.41               | 7.01           |
| 0.50                     | 0.45      | 7.28               | 6.83           |
| 0.75                     | 0.48      | 7.14               | 6.67           |

|      |      |       |       |
|------|------|-------|-------|
| 1.00 | 0.50 | 7.41  | 6.91  |
| 1.25 | 0.55 | 7.66  | 7.10  |
| 1.50 | 0.60 | 7.81  | 7.20  |
| 1.75 | 0.66 | 8.12  | 7.46  |
| 2.00 | 0.72 | 8.56  | 7.84  |
| 2.25 | 0.83 | 9.23  | 8.39  |
| 2.50 | 0.98 | 9.76  | 8.79  |
| 2.75 | 1.08 | 10.45 | 9.37  |
| 3.00 | 1.13 | 11.45 | 10.33 |
| 3.25 | 1.25 | 12.32 | 11.07 |
| 3.50 | 1.36 | 13.07 | 11.72 |
| 3.75 | 1.54 | 13.83 | 12.30 |
| 4.00 | 1.62 | 13.82 | 12.20 |
| 4.25 | 1.79 | 15.15 | 13.36 |
| 4.50 | 1.86 | 14.33 | 12.47 |
| 4.75 | 2.01 | 14.67 | 12.66 |
| 5.00 | 2.25 | 16.49 | 14.24 |
| 5.25 | 2.41 | 17.48 | 15.08 |
| 5.50 | 2.48 | 16.63 | 14.15 |
| 5.75 | 2.78 | 18.81 | 16.02 |
| 6.00 | 2.85 | 19.67 | 16.82 |
| 6.25 | 2.89 | 19.03 | 16.14 |
| 6.50 | 3.00 | 19.67 | 16.67 |
| 6.75 | 3.30 | 18.43 | 15.12 |
| 7.00 | 3.64 | 20.28 | 16.64 |
| 7.25 | 3.82 | 22.79 | 18.97 |
| 7.50 | 3.92 | 24.13 | 20.21 |
| 7.75 | 4.05 | 21.26 | 17.21 |

---

*Notes.* PE = preeclampsia; % = percentage of quarterly visits in relation to observed patients
